# Supplementary material for: A Study of the Relationship between Serum Bile Acids and Propranolol Pharmacokinetics and Pharmacodynamics in Patients with Liver Cirrhosis and in Healthy Controls
Source: PubMed Central journal article supplement (PMC4048194; doi:10.1371/journal.pone.0097885), 2014-06-06
Supplement: pone.0097885.s001.pdf [file pone.0097885.s001.pdf]

Suppl Fig. 1

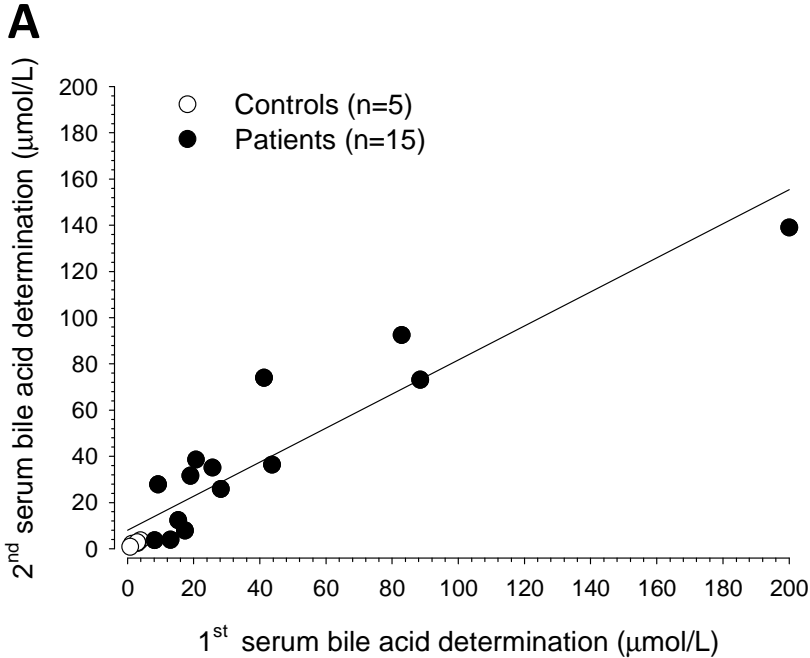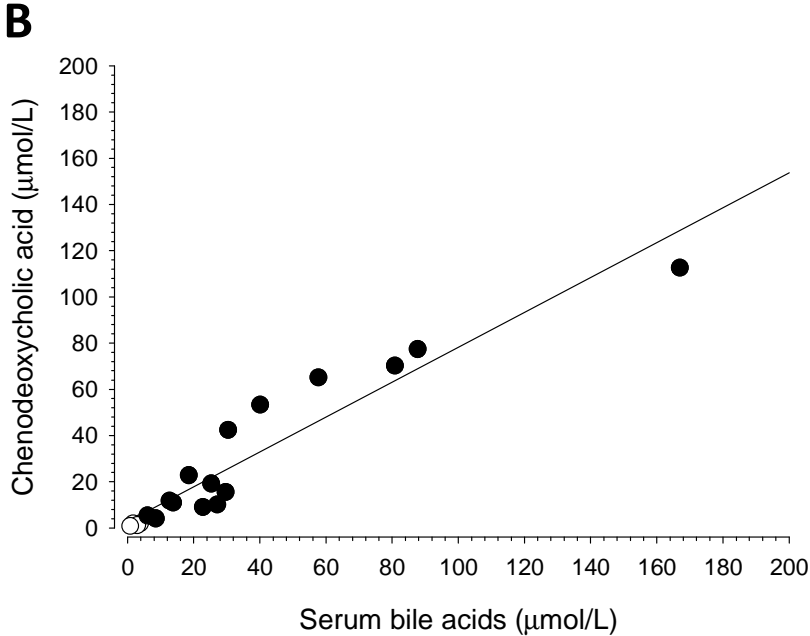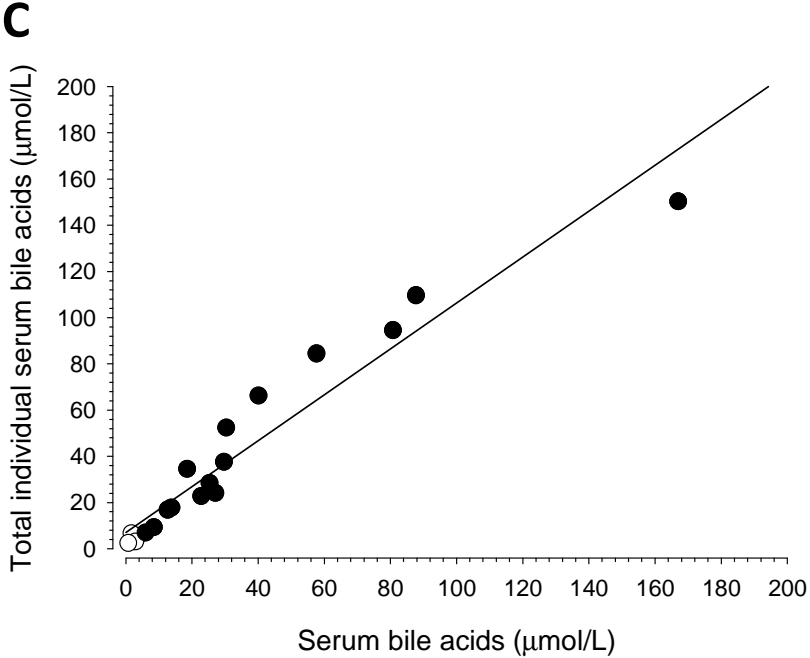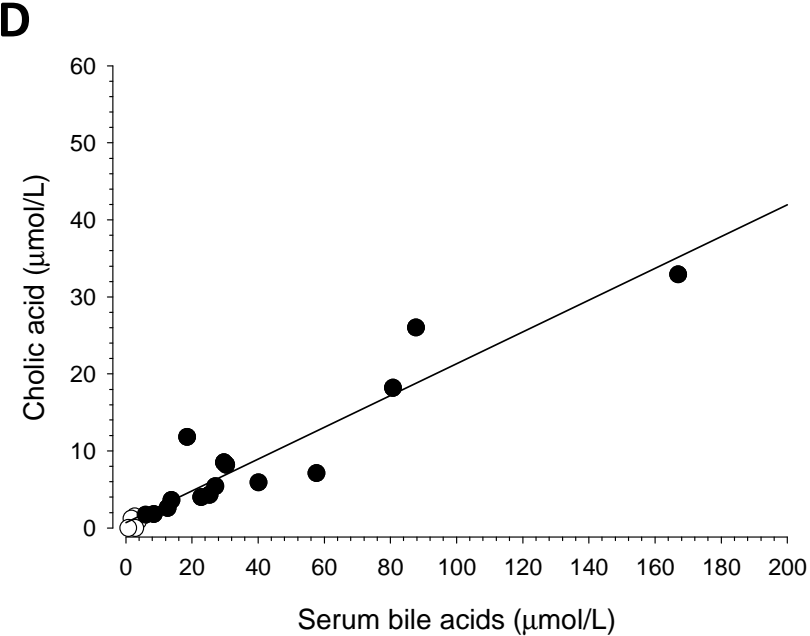

Suppl Fig. 2

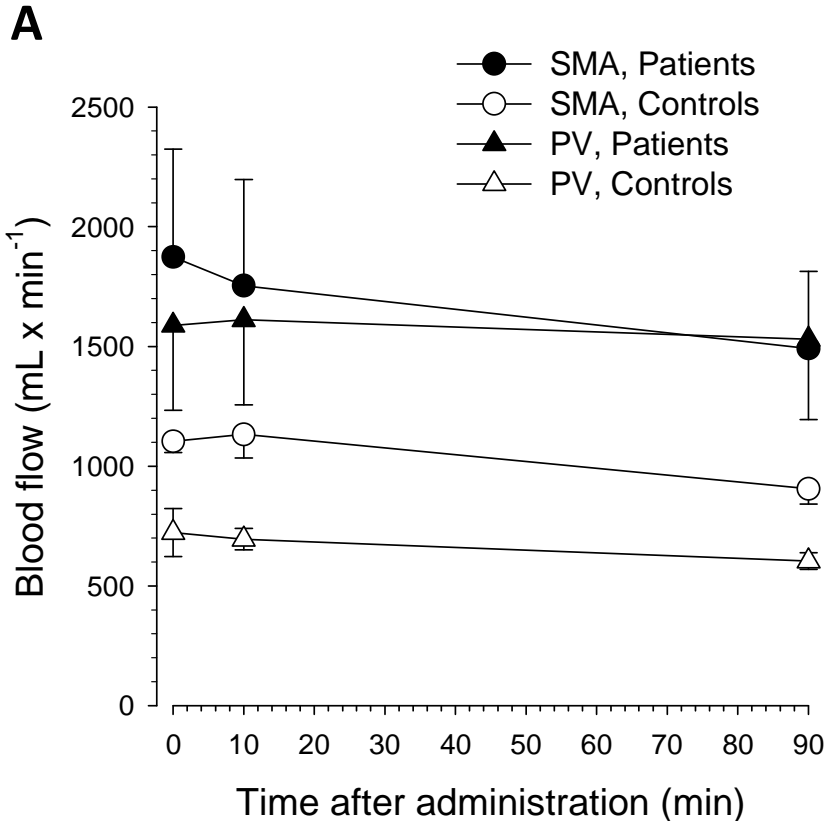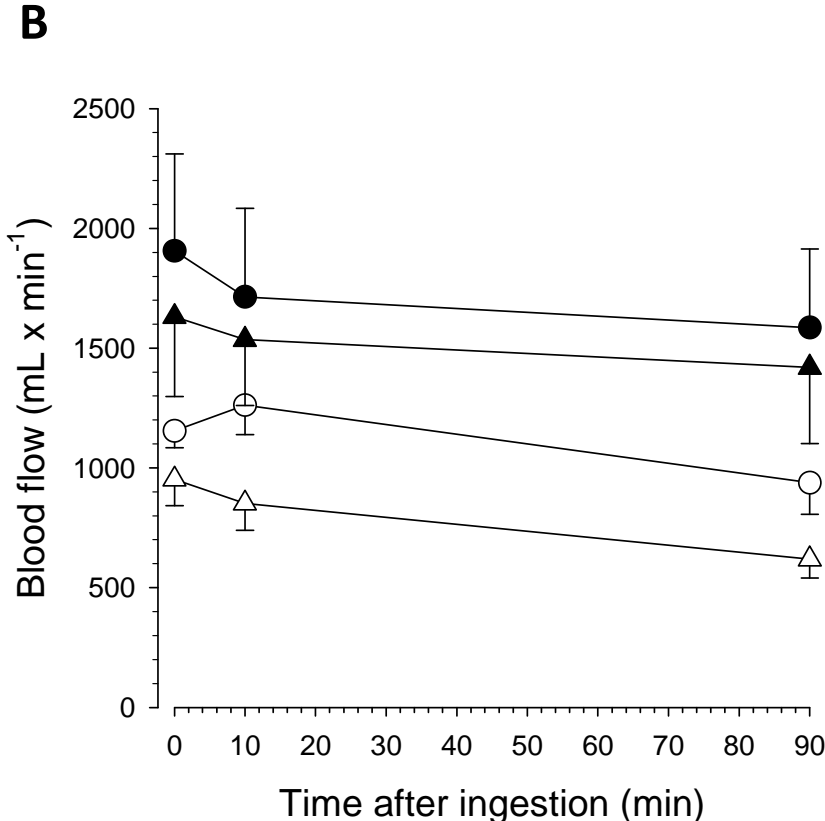

Suppl Fig. 3

**A**

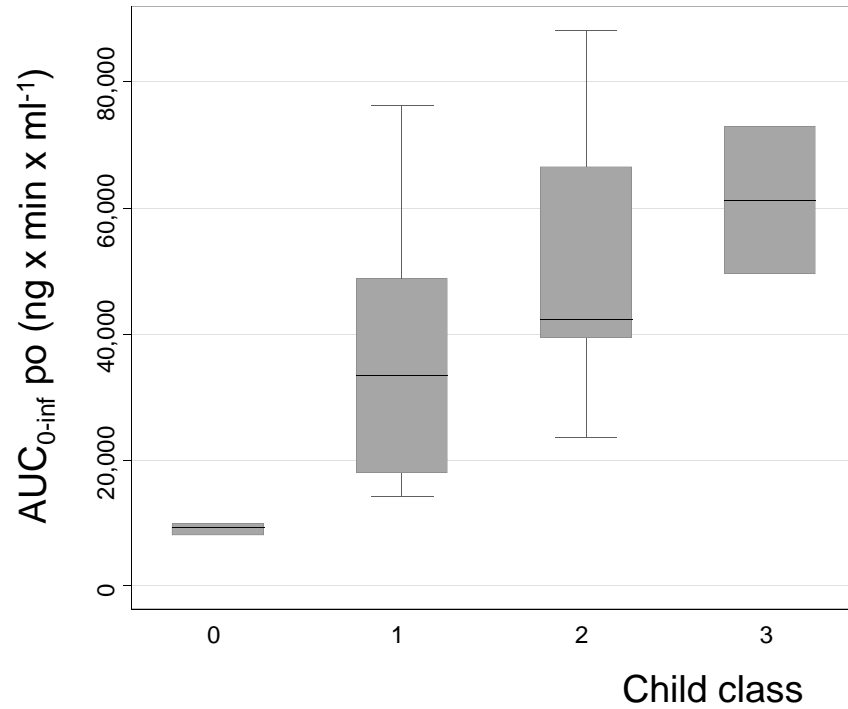

0 = healthy controls (n = 5)  
1 = Class A (n = 6)  
2 = Class B (n = 5)  
3 = Class C (n = 2)

**B**

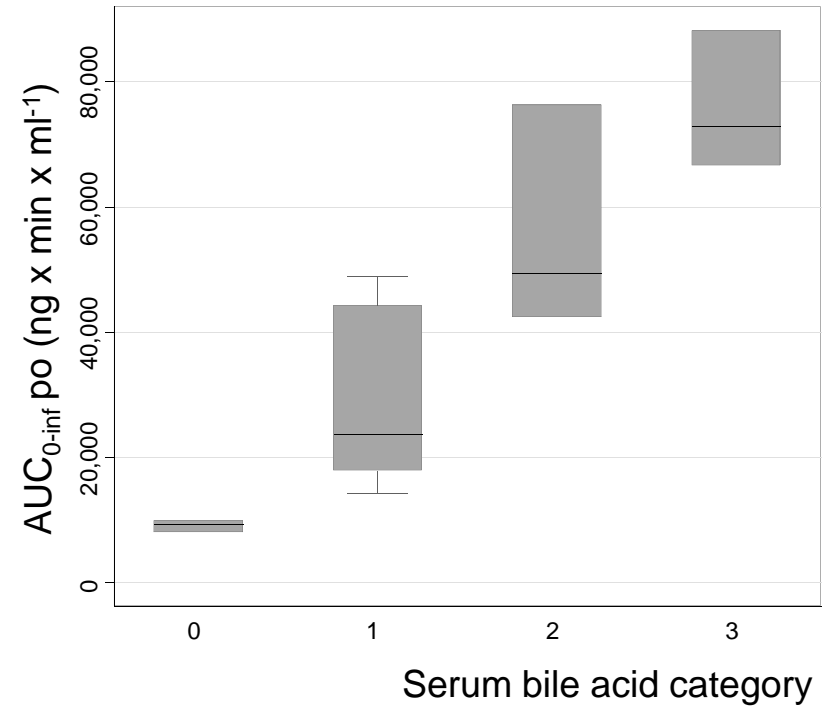

0 = < 6  $\mu\text{mol/l}$  (n = 5 controls)  
1 = 6.1 – 20  $\mu\text{mol/l}$  (n = 5 patients)  
2 = > 20 - 40  $\mu\text{mol/l}$  (n = 4 patients)  
3 = > 40  $\mu\text{mol/l}$  (n = 4 patients)
